# Supplementary material
Source: HighWire-hosted journal article supplement (https://bmjopenquality.bmj.com/highwire/filestream/136255/field_highwire_adjunct_files/0/ds4266.docx)

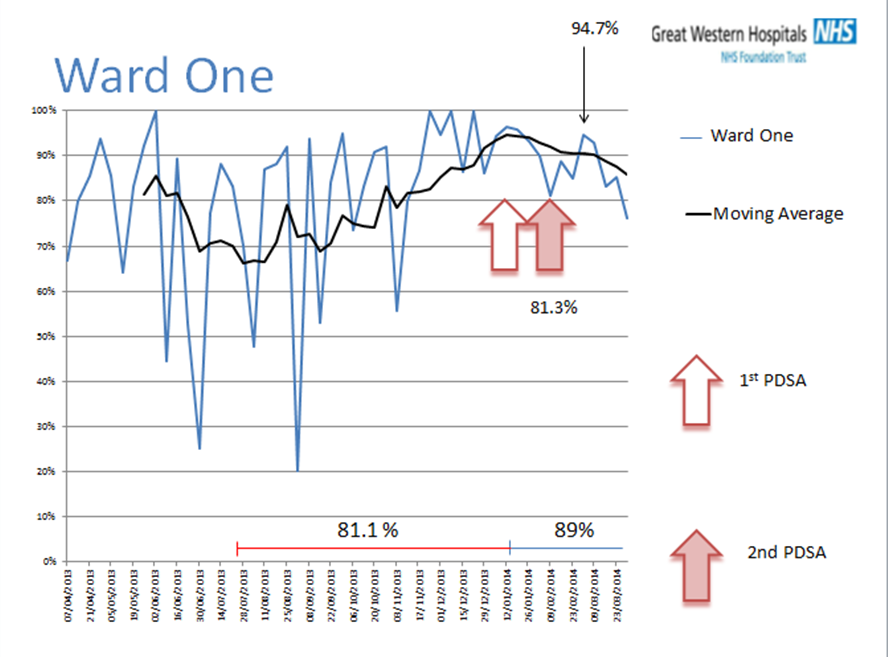

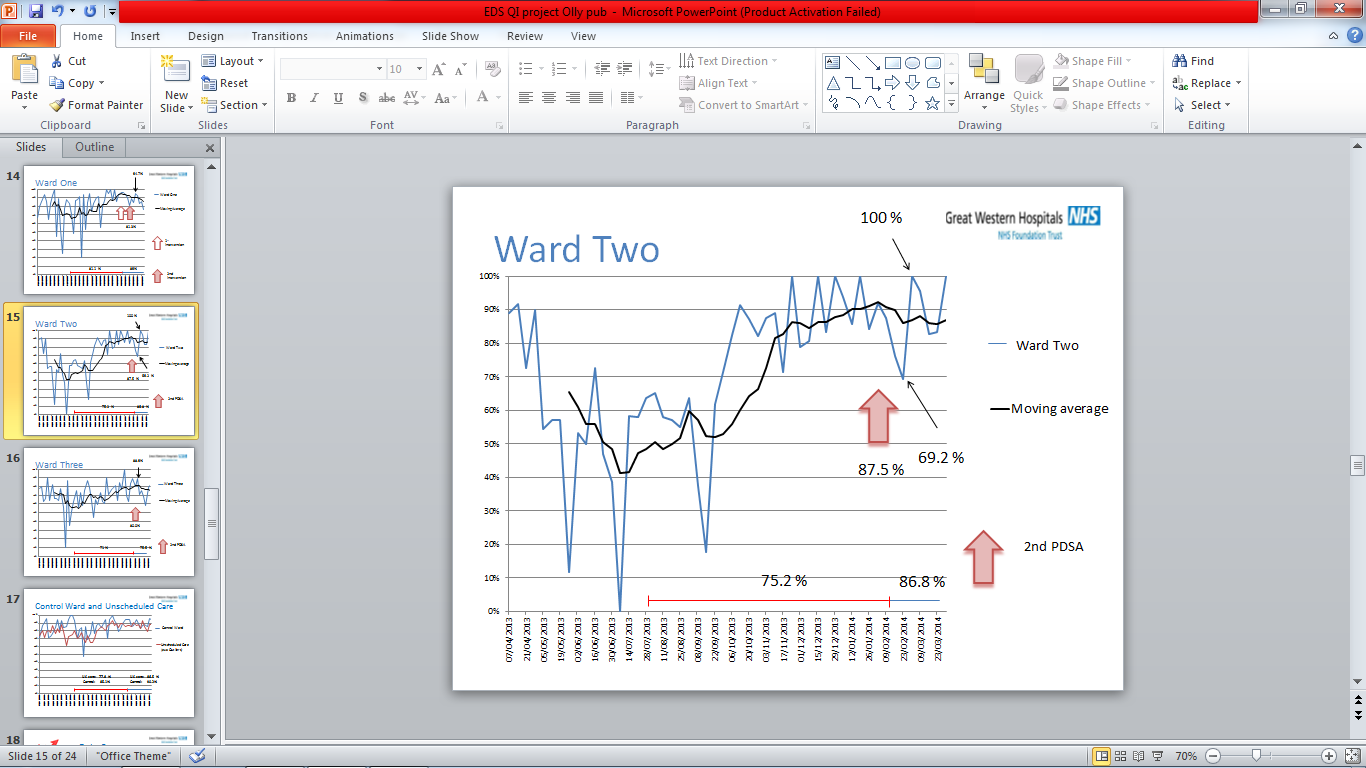

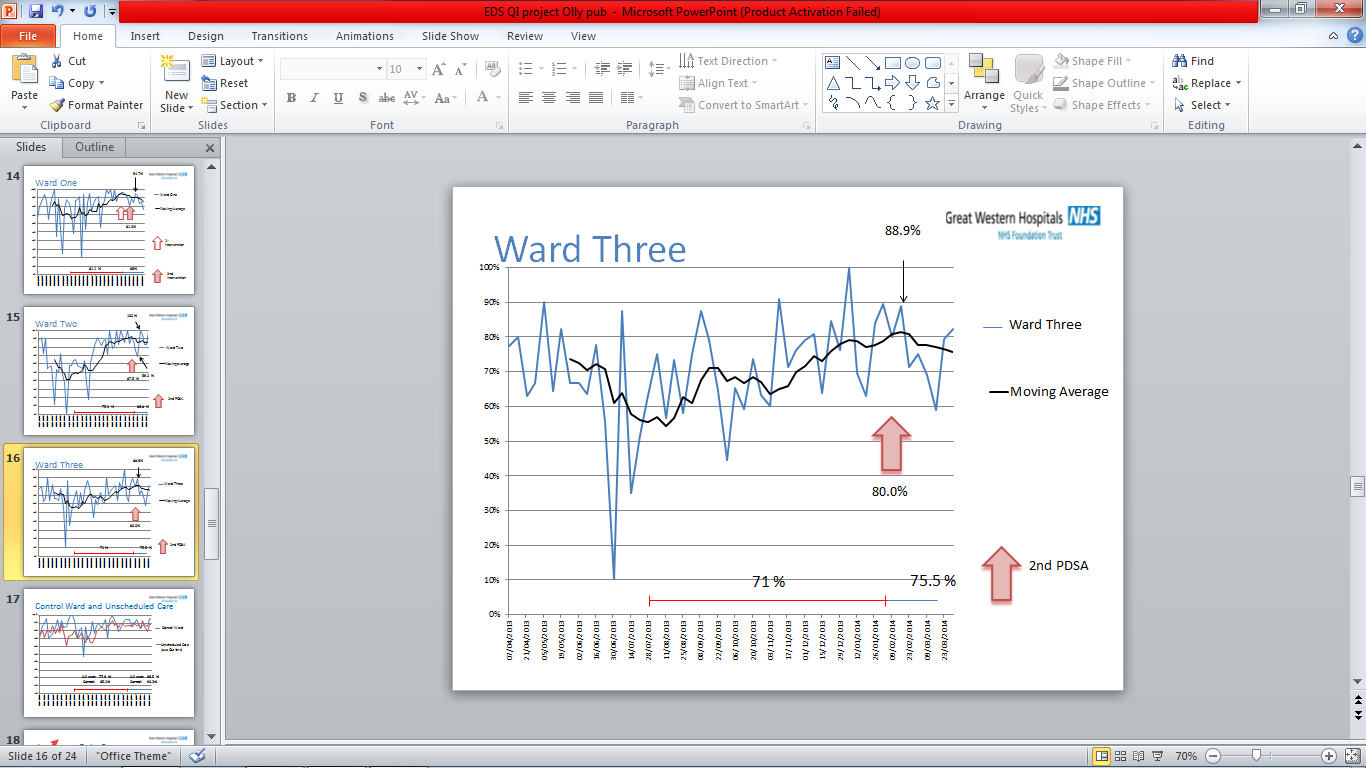

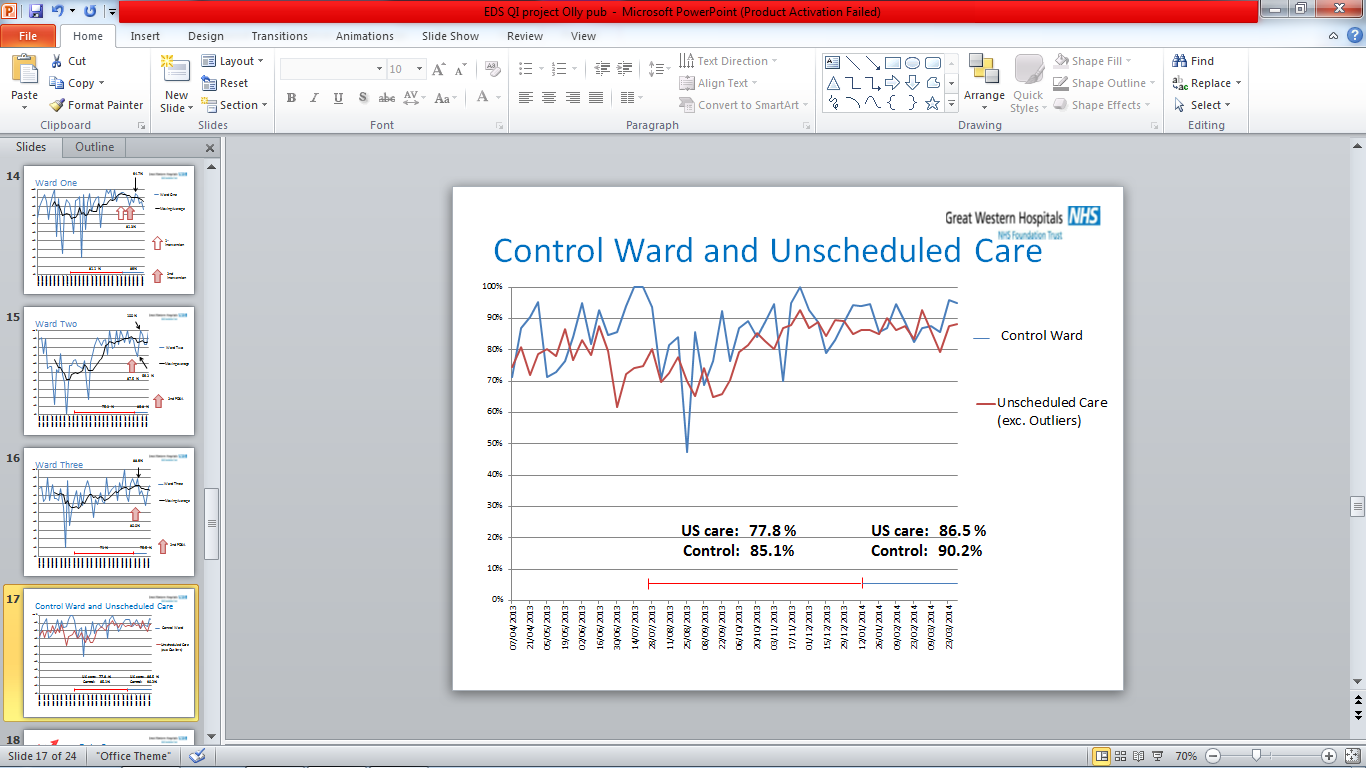

Supplement: ds4266.docx [file ds4266.docx]
